# Supplementary material
Source: PubMed Central journal article supplement (PMC5467741)

## 1 **Supplemental Information**

2

### 3 **METHODS**

#### 4 **Patients and tissue samples**

5 Sinonasal and polyp tissues were obtained from patients with CRS during routine functional endoscopic sinus  
6 surgery. All subjects provided written informed consent for study participation, and the study was approved by  
7 the internal review board of the Seoul National University Hospital, Boramae Medical Center (No. 06-2012-  
8 109). The diagnosis of CRS was based on personal history, physical examination, nasal endoscopy, and CT  
9 findings of the sinuses according to the 2012 European position paper on rhinosinusitis and nasal polyps (EPOS)  
10 guidelines. Exclusion criteria were as follows: (1) younger than 18 years of age, (2) prior treatment with  
11 antibiotics, systemic or topical corticosteroids, or other immune-modulating drugs for 4 weeks before surgery,  
12 and (3) unilateral rhinosinusitis, antrochoanal polyp, allergic fungal sinusitis, cystic fibrosis, or immotile ciliary  
13 disease. Control tissues were obtained during other rhinologic surgeries, such as skull base, lacrimal duct, or  
14 orbital decompression surgery, from patients without any sinonasal diseases. Uncinate process (UP) tissue was  
15 obtained from control subjects and those with CRSsNP or CRSwNP. NP tissue in patients with CRSwNP also  
16 was evaluated. Each sample was divided into three parts: one third was fixed in 10% formaldehyde and  
17 embedded in paraffin for histological analysis, another third was immediately frozen and stored at -80°C for  
18 subsequent isolation of mRNA, and the final third was submerged in 1 mL phosphate-buffered saline (PBS)  
19 supplemented with 0.05% Tween-20 (Sigma-Aldrich, St Louis, MO) and 1% PIC (Sigma-Aldrich) per 0.1 g of  
20 tissue. The latter tissue was homogenized with a mechanical homogenizer at 1,000 rpm for 5 min on ice. After  
21 homogenization, the suspensions were centrifuged at 3,000 rpm for 10 min at 4°C and the supernatants were  
22 separated and stored at -80°C for further analysis of cytokines and other inflammatory mediators. The atopic  
23 status of study subjects was evaluated using the ImmunoCAP<sup>®</sup> assay (Phadia, Uppsala, Sweden) to detect IgE  
24 antibodies against six mixtures of common aeroallergens (house dust mites; molds; trees; weeds and grass  
25 pollen; and animal danders). Subjects were considered atopic if the allergen-specific IgE level was greater than  
26 3.51 KU/L to any one or more of the allergens. Also, total IgE levels in nasal tissue homogenates were measured  
27 using the ImmunoCAP<sup>®</sup> assay. A diagnosis of asthma was based on the medical history and lung function  
28 analysis, including challenge tests by an allergist. In this study, CRSwNP were classified as eosinophilic NP (E-  
29 NP) if eosinophils comprised more than 10% of the inflammatory cell population and as non-eosinophilic NP

30 (NE-NP) if eosinophils comprised less than 10% of the inflammatory cells.

31

### 32 **Immunohistochemistry (IHC)**

33 Single immunohistochemical staining was performed using the polink-2 plus polymerized horseradish  
34 peroxidase (HRP) broad DAB-Detection System (Golden Bridge International Labs.,WA).Briefly,after  
35 deparaffinization, sections were incubated in 3% hydrogen peroxidase to inhibit endogenous peroxidases. Heat-  
36 induced epitope retrieval was then performed by microwaving samples in 10 mmol/L citrate buffer (pH 6.0).  
37 The sections were incubated for 60 minutes at room temperature in a primary antibody. The primary antibodies  
38 were rabbit anti-periostin (1:2000; Abcam, Cambridge, UK), rabbit anti-CD51 as marker for integrin  $\alpha$ V (1:150;  
39 Abcam) and TSLP (1:1000; Abcam). The sections were incubated in broad antibody enhancer and polymer-HRP  
40 and then stained with the DAB Detection System. Finally, slides were counterstained with hematoxylin. The  
41 numbers of positive cells were counted in the five densest visual fields (400 $\times$ ) by two independent observers,  
42 and the average values were determined. Sequential double IHC was employed using polymer-HRP and alkaline  
43 phosphatase (AP) kits to detect mouse anti-mast-cell tryptase (1:500; Abcam) and rabbit anti-periostin primary  
44 antibodies for human tissue with permanent-Red and Emerald (Polink DS-MR-Hu C2 Kit; Golden Bridge  
45 International Labs).

46

### 47 **qRT-PCR analysis**

48 Total RNA was extracted from tissue samples using the TRI reagent (Invitrogen, Carlsbad, CA). One  
49 microgram total RNA was reverse transcribed to cDNA using the cDNA Synthesis Kit (amfiRivert Platinum  
50 cDNA Synthesis Master Mix, GenDEPOT). Quantitative real-time PCR (qRT-PCR) was performed. For analysis  
51 of POSTN (Hs01566734\_m1), CD51 (integrin  $\alpha$ V, Hs00233808\_m1), IL-4 (Hs00174122\_m1), IL-5  
52 (Hs01548712\_g1), IL-13 (Hs00174379\_m1), IL-17A (Hs00174383\_m1), IFN- $\gamma$  (Hs00989291\_m1), TSLP  
53 (Hs00263636\_m1), IL-25 (Hs03044841\_m1), IL-33 (Hs00369211\_m1) and GAPDH (Hs02758991\_g1), pre-  
54 developed assay reagent (PDAR) kits of primers and probes were purchased from TaqMan assays (Life  
55 Technologies Korea, Seoul, Korea). Pre-developed assay reagent kits containing primers and probes were  
56 purchased from Applied Biosystems (Foster City, CA). Expression of GAPDH was used as an internal control  
57 for normalization. Cycling conditions were as follows: 95°C for 5 min followed by 60 cycles at 95°C for 15 sec,  
58 60°C for 20 sec, and 72°C for 20 sec. To analyze the data, Sequence Detection Software version 1.9.1 (Applied  
59 Biosystems) was utilized. Relative gene expression was calculated using the comparative  $2^{-\Delta\Delta CT}$  method.

60

**61 Measurement of cytokines and total IgE in tissue homogenates**

62 The protein concentrations for tissue extracts were determined using the Pierce 660nm Protein Assay Kit  
63 (Thermo Scientific Inc., NY). Samples were thawed at room temperature and vortexed to ensure well-mixed  
64 sample. Tissue homogenates were then assayed for periostin proteins by using commercially available ELISA  
65 kits (R&D systems, MN). Multiple cytokine analysis kits (IL-4, IL-5, IL-13, IL-17A, IL-25, IL-33, CXCL-8,  
66 CCL-11, and IFN- $\gamma$ ) were obtained from R&D systems (Cat. No. LMSAHM) and data collected using Luminex  
67 100 (Luminex, Austin, TX). Data analysis was performed using the MasterPlex QT version 2.0 (MiraiBio,  
68 Alameda, CA). Total IgE levels in nasal tissue homogenates were measured by using the ImmunoCAP<sup>®</sup> assay.  
69 All kinds of assays were run in duplicate according to the manufacturers' protocol. All the protein levels in the  
70 tissue homogenate were normalized to the concentration of total protein.

71

**72 Human mast cell culture and measurement of cytokine production**

73 LAD2 mast cells (MCs) were cultured in serum-free media (StemPro-34 SFM, Life Technologies)  
74 supplemented with 2 mM L-glutamine, 100 U/ml penicillin, 50  $\mu$ g/ml streptomycin and 100 ng/ml stem cell  
75 factor (SCF). The cell suspensions were cultured at a density of  $10^5$  cells/ml and maintained at 37°C and 5%  
76 CO<sub>2</sub>. LAD2 cells were suspended at  $0.2 \times 10^6$  cells per well in fresh media containing 100 ng/mL of SCF, and  
77 sensitized with 0.5  $\mu$ g/mL of biotinylated IgE (bIgE; Abbiotec, San Diego, CA) overnight at 37°C. Sensitized  
78 cells were resuspended at  $0.5 \times 10^6$  cells/mL in fresh media and stimulated with 0.05-0.5  $\mu$ g/mL streptavidin  
79 (Life Technologies), recombinant human IL-4 (10 ng/ml), recombinant human IL-13 (10 ng/ml) or recombinant  
80 human TNF (10 ng/mL) for 3 hr at 37°C. RNA was isolated using Trizol. Reverse transcription of total RNA and  
81 amplification of target mRNA were performed using the iScript Select cDNA synthesis kit from (BioRad). The  
82 gene target, periostin was amplified using gene specific primers, designed for end point evaluation using Primer  
83 Express software (Perkin Elmer). The primer sequences for periostin were as follows: 5'-  
84 GATGCAGTGCCTGTGGAAATA-3' Forward, 5'- CTGAGAACGACCTTCCCTTAATC-3' Reverse,  
85 Housekeeping gene, GAPDH primer set: 5'-GAAGGTGAAGGTCGGAGTC-3' Forward, 5'-  
86 GAAGATGGTGATGGGATTTTC-3' Reverse. qRT-PCR analysis was performed using Perfecta Sybr supermix  
87 from Quanta Bioscience (VWR). The reaction conditions were as follows: 95°C for 3 min (Hold) 1 cycle and  
88 95°C for 10 sec, 55°C for 30 sec, 72°C for 60 sec (cycling) 40 cycles. Resulting PCR products were measured by  
89 the sequence detector Qiagen Rotor-Gene Q (Qiagen). Quantitation of gene expression by real-time RT-PCR

90 was evaluated using the copy number method. Secreted periostin was measured in cell supernatants using a  
91 sensitive and specific ELISA according to the manufacturer's instructions (BioVision, Inc). The detection limit  
92 for the assay was 15 pg/ml.

93

#### 94 **Human bronchial epithelial cell culture**

95 Normal human bronchial epithelial (NHBE) cells were purchased from Lonza (Walkersville, MD) and cultured  
96 in serum-free bronchial epithelial growth medium (BEGM, Lonza) at 37°C in a humidified environment  
97 containing 5% CO<sub>2</sub>. NHBE cells were plated in 12-well culture plates coated with collagen (Corning, NY) and  
98 grown 40-50% confluence. Before treatment, NHBE cells were maintained in BEGM without hydrocortisone  
99 for at least 2 days. NHBE cells were treated with recombinant human IL-4 or IL-13 (100ng/ml, each; R&D  
100 systems, Minneapolis, MN) with or without periostin (10 or 100 ng/ml; R&D systems) for 72 hours.  
101 Additionally, in each experiment, NHBE cells were stimulated with poly(I:C)(5 µg/ml; InvivoGen, San Diego,  
102 CA) at 1 hour after treatment with IL-4, IL-13, and/or periostin. Anti-integrin  $\alpha$ V $\beta$ 3 and anti-integrin  $\alpha$ V $\beta$ 5  
103 (2.5µg/ml; R&D systems) were added to confirm reversibility of periostin-induced TSLP production. Cell  
104 culture supernatants were collected and used for TSLP protein ELISA (R&D systems, Minneapolis, MN).

105

#### 106 **Statistical analysis**

107 Statistical analyses were performed using IBM SPSS 21 (SPSS, Inc., Chicago, IL) and GraphPad Prism  
108 software 6.0 (GraphPad software Inc, La Jolla, CA). The Kruskal-Wallis test and the Mann-Whitney *U*-test with  
109 a 2-tailed test for unpaired comparisons were used. For comparisons between groups, the Kruskal-Wallis test  
110 was used to establish significant intergroup variability. The Mann-Whitney *U*-test was then used for between-  
111 group comparisons. The Pearson correlation test was also used to determine variable relationships. If the data  
112 were not normally distributed, the Spearman correlation coefficient was utilized. The significance level was set  
113 at an  $\alpha$  value of 0.05.

114 **Figure Legends**

115

116 **Supplementary Fig 1. Expression of periostin in eosinophilic nasal polyps**

117 (A) Relative periostin mRNA expression was measured by qRT-PCT in tissues from each group (n=22 for  
118 Control-UP, n=62 for CRSsNP-UP, n=68 for CRSwNP-UP, and n=67 for CRSwNP-NP). (B) Protein levels of  
119 periostin were measured by ELISA (n=7 for Control-UP, n=11 for CRSsNP-UP, n=12 for CRSwNP-UP, and  
120 n=43 for CRSwNP-NP). (C) Correlation between Lund-MacKay CT score and protein levels of periostin in  
121 different subtypes of CRSwNP

122

123 **Supplementary Fig 2. Correlation between periostin expression and major cytokines in NP.**

124 (A) IL-5 (n=18 for E-NP and n=16 for NE-NP). (B) CCL-11 (n=18 for E-NP and n=16 for NE-NP). (C) IL-17A  
125 (n=18 for E-NP and n=16 for NE-NP). (D) IFN- $\gamma$  (n=18 for E-NP and n=26 for NE-NP). (E) Periostin levels in  
126 comparison with total IgE in NP homogenates (n=16 for E-NP and n=15 for NE-NP).

127

128 **Supplementary Fig 3. Schematic depiction of periostin-mediated cross-talk between mast cells and epithelium.**

129

130

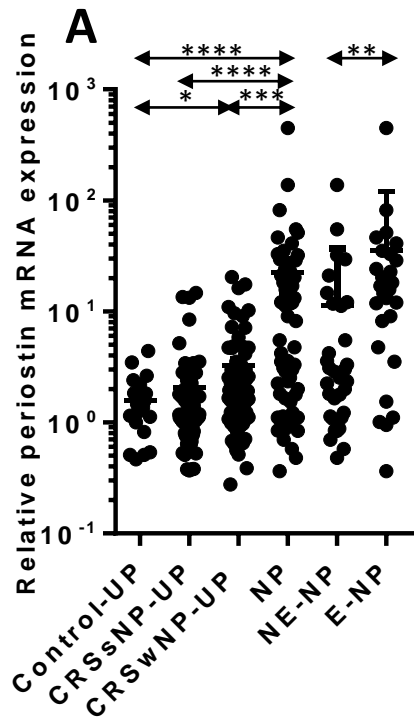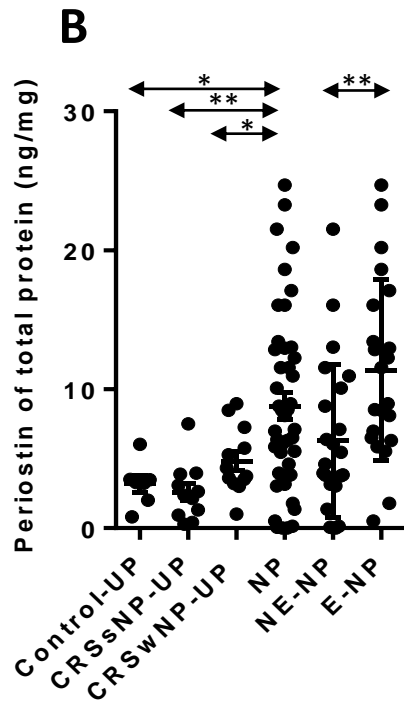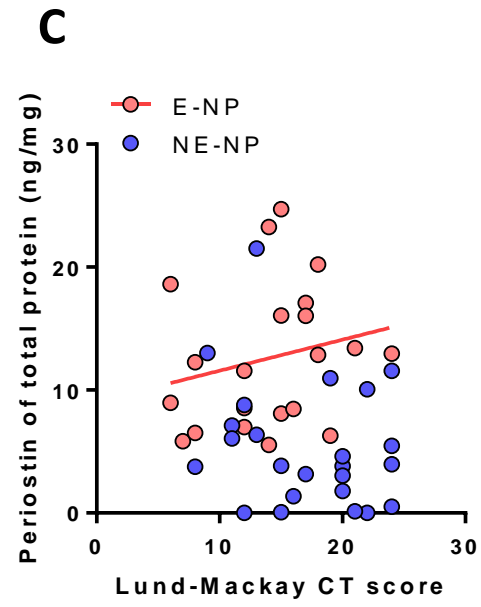

**A**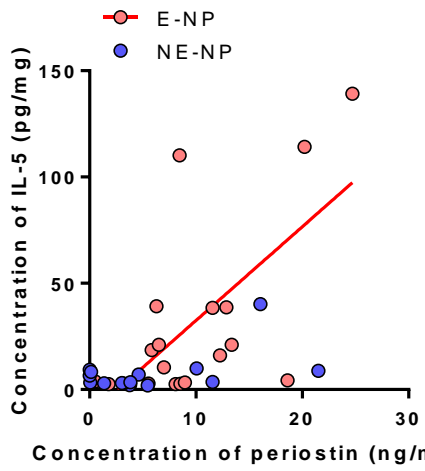**B**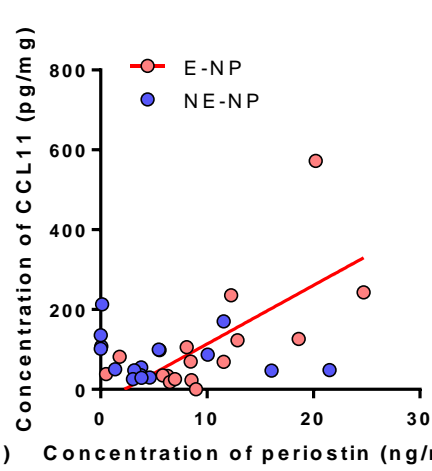**C**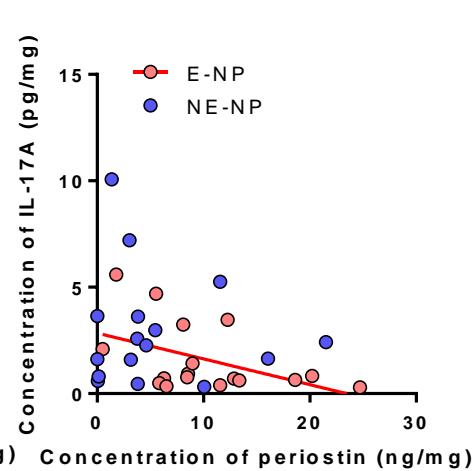**D**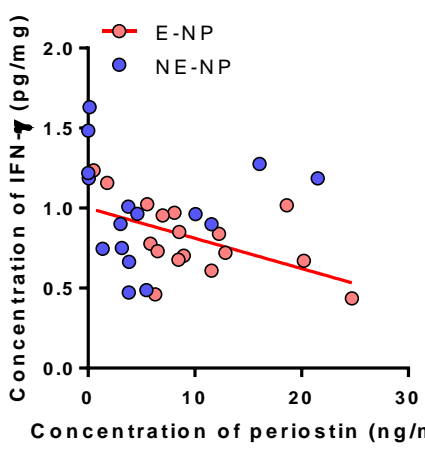**E**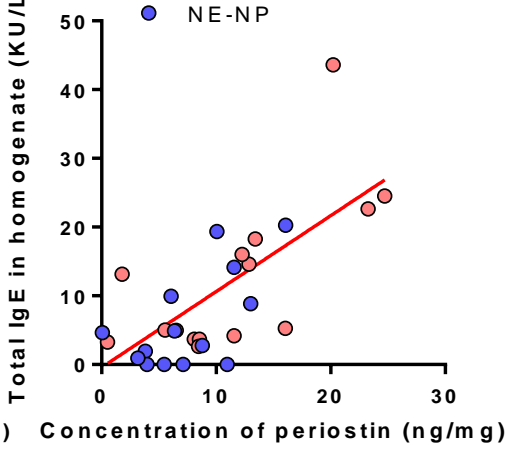

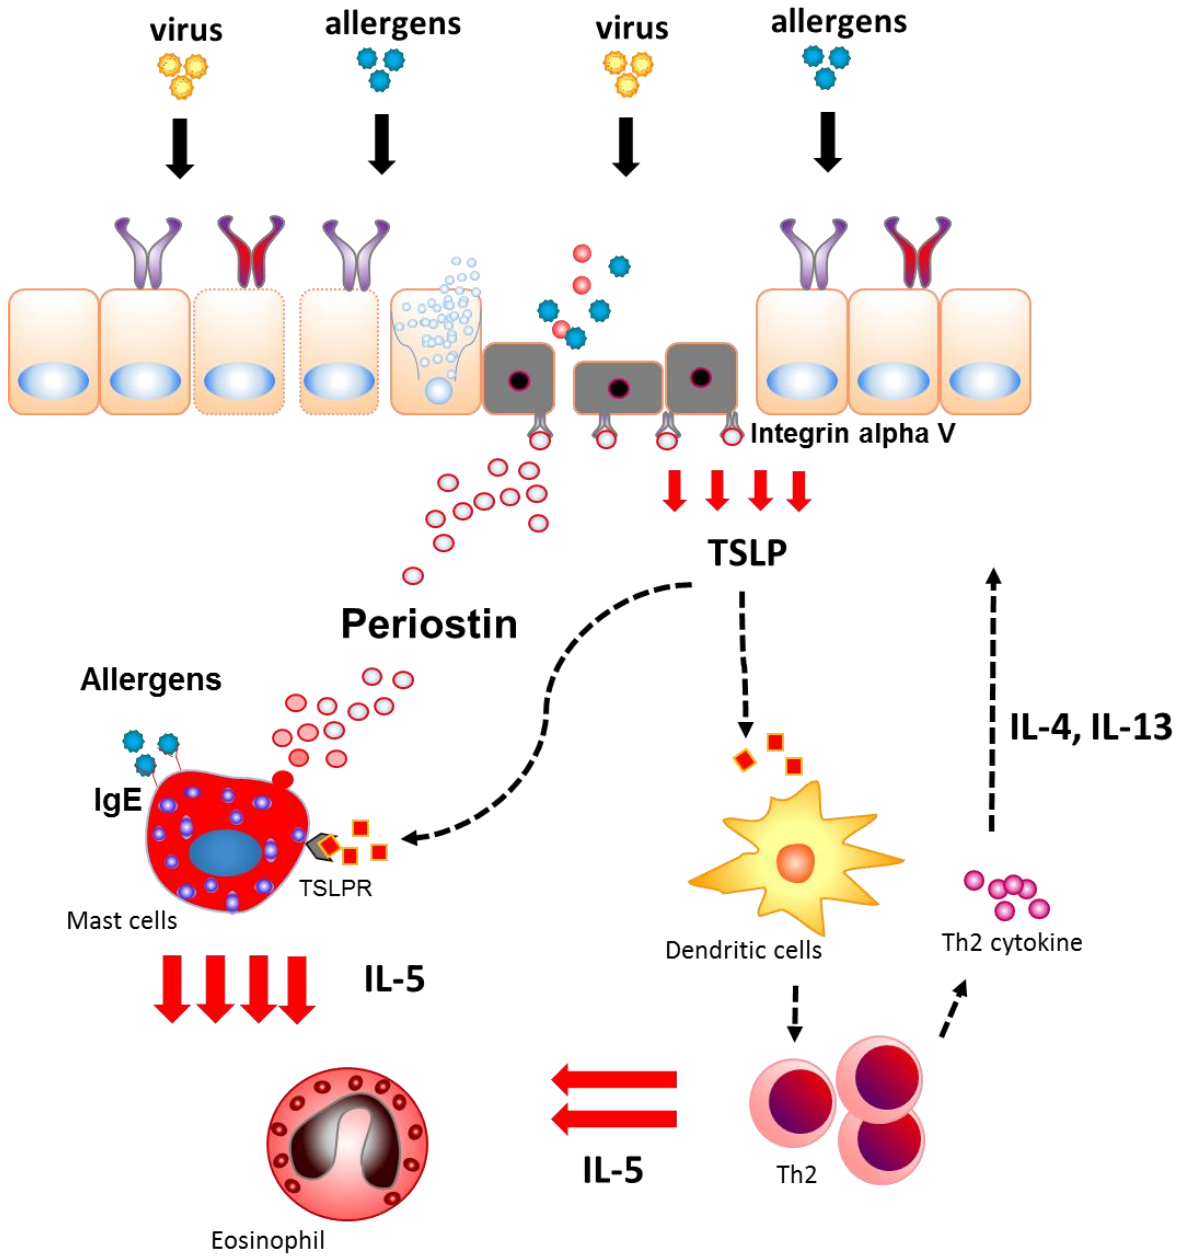

Supplement: NIHMS831887-supplement-supplement_1.pdf [file NIHMS831887-supplement-supplement_1.pdf]
